# Supplementary material for: Hierarchical Fe3O4@titanate microspheres with superior removal capability for water treatment: in situ growth and structure tailoring via hydrothermal assisted etching
Source: Royal Society of Chemistry journal article supplement (doi:10.1039/c5ra06362k), 2015-01-01
Supplement: c5ra06362k1.pdf [file c5ra06362k1.pdf]

## Supplementary Information

# Hierarchical Fe<sub>3</sub>O<sub>4</sub>@titanate microspheres with superior removal capability for water treatment: In-situ growth and structure tailoring via hydrothermal assisted etching

Liang Shi <sup>a</sup>, Bohua Dong <sup>b,\*</sup>, Rongjie Gao <sup>b</sup>, Ge Su <sup>b</sup>, Wei Liu <sup>b</sup>, Chenghui Xia <sup>a,c</sup>,  
Fenghuan Zhao <sup>b</sup>, Lixin Cao <sup>b,\*</sup>

<sup>a</sup> College of Chemistry and Chemical Engineering, Ocean University of China, Qingdao  
266100, PR China

<sup>b</sup> Institute of Materials Science and Engineering, Ocean University of China, Qingdao 266100,  
PR China

<sup>c</sup> Debye Institute, Utrecht University, Princetonplein 1, 3584 CC Utrecht, Netherlands

Tel: (+86) 532 6678 1901

E-mail: dongbohua@ouc.edu.cn (Bohua Dong)

caolixin@ouc.edu.cn (Lixin Cao)

|                                      | Mean (mV)     | Area (%) | Width (mV) |
|--------------------------------------|---------------|----------|------------|
| <b>Zeta Potential (mV):</b> -52.0    | Peak 1: -52.0 | 100.0    | 5.85       |
| <b>Zeta Deviation (mV):</b> 5.85     | Peak 2: 0.00  | 0.0      | 0.00       |
| <b>Conductivity (mS/cm):</b> 0.00246 | Peak 3: 0.00  | 0.0      | 0.00       |

**Result quality:** Good

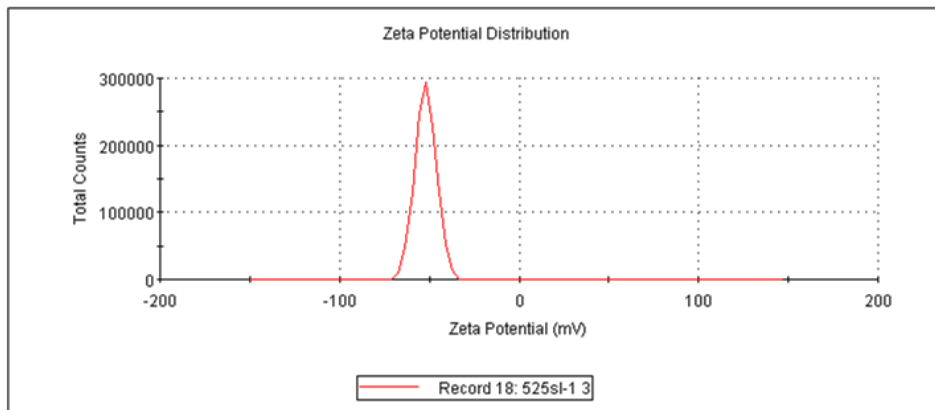

Figure S1. Zeta potential of as-prepared Fe<sub>3</sub>O<sub>4</sub> microspheres.

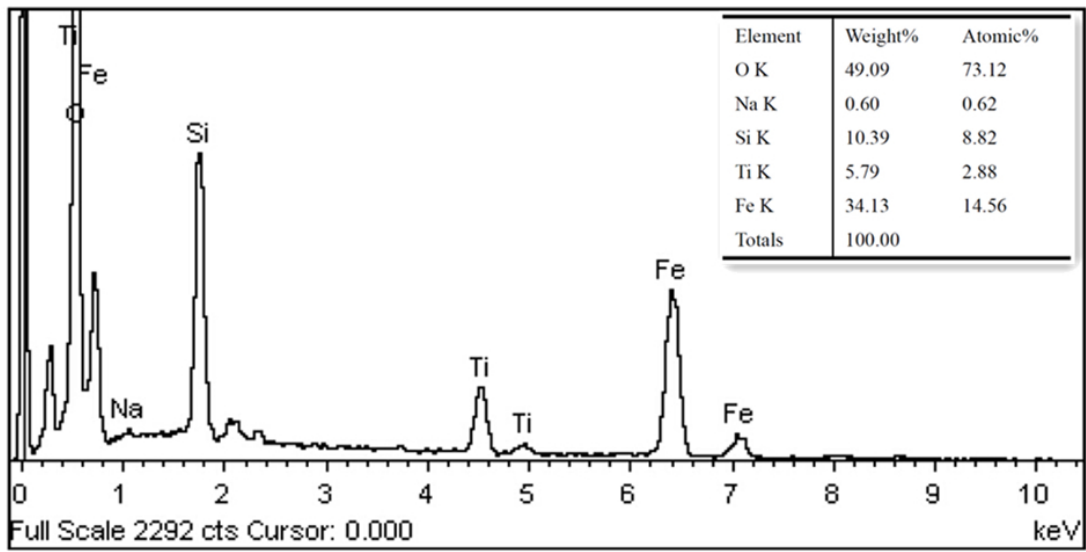

Figure S2. EDX results of  $\text{Fe}_3\text{O}_4@\text{SiO}_2@\text{AT}$  microspheres.

|                                     | Mean (mV)            | Area (%) | Width (mV) |
|-------------------------------------|----------------------|----------|------------|
| <b>Zeta Potential (mV):</b> -34.8   | <b>Peak 1:</b> -34.8 | 100.0    | 4.18       |
| <b>Zeta Deviation (mV):</b> 4.18    | <b>Peak 2:</b> 0.00  | 0.0      | 0.00       |
| <b>Conductivity (mS/cm):</b> 0.0234 | <b>Peak 3:</b> 0.00  | 0.0      | 0.00       |

**Result quality :** Good

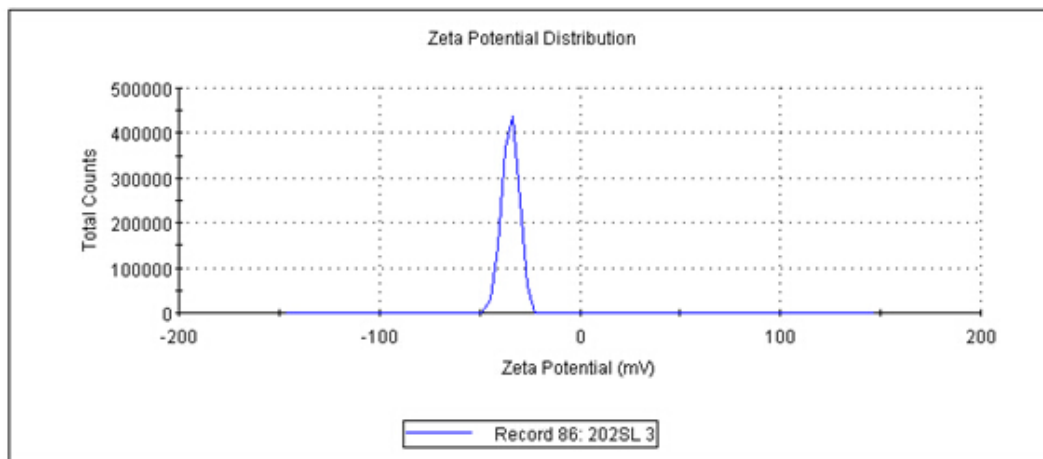

Figure S3. Zeta potential of Fe<sub>3</sub>O<sub>4</sub>@titanate microspheres.

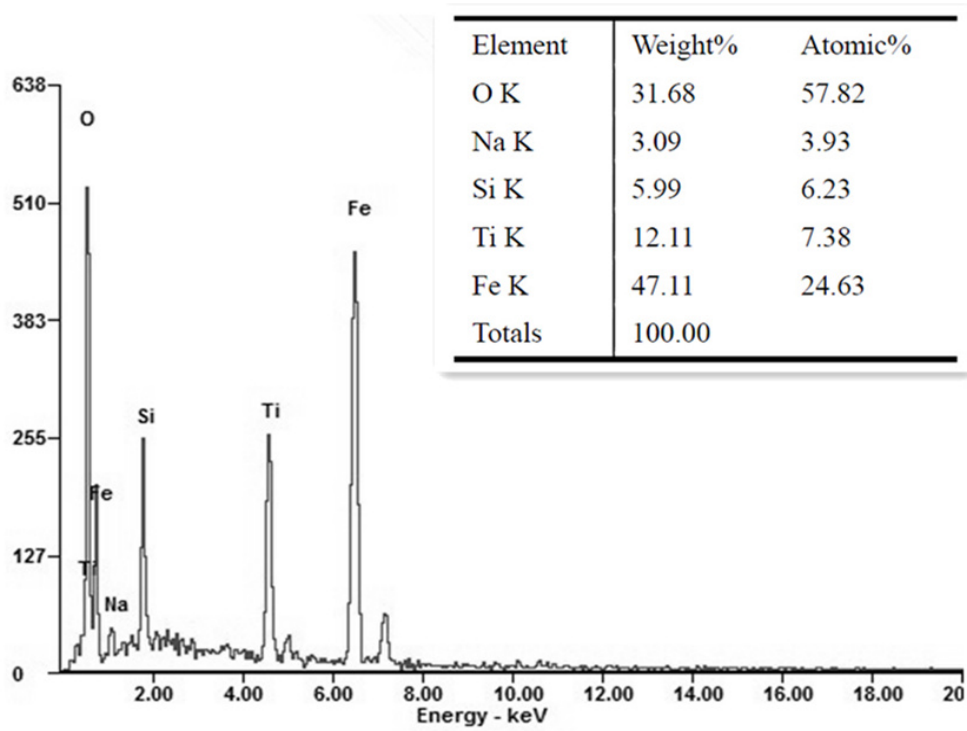

Figure S4. EDX results of Fe<sub>3</sub>O<sub>4</sub>@titanate microspheres.

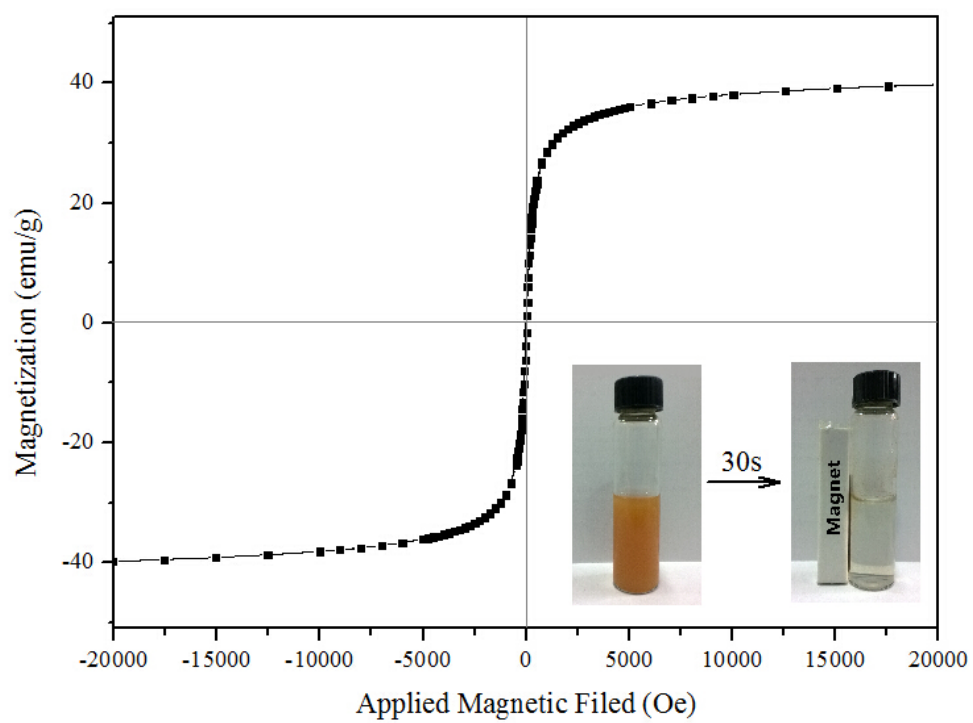

Figure S5. Magnetization loops for hierarchical  $\text{Fe}_3\text{O}_4$ @titanate microspheres(300K)
